# Supplementary material for: Isolation and characterization of porcine macrophages and their inflammatory and fusion responses in different stiffness environments
Source: Royal Society of Chemistry journal article supplement (doi:10.1039/d1bm00746g), 2021-01-01
Supplement: d1bm00746g1.pdf [file d1bm00746g1.pdf]

**Supplementary information for:**

**Isolation and characterization of porcine macrophages and their inflammatory and fusion responses in different stiffness environments**

Vijaykumar S. Meli<sup>1,2</sup>, Ryan P. Donahue<sup>1</sup>, Jarrett M. Link<sup>1</sup>, Jerry C. Hu<sup>1</sup>, Kyriacos A. Athanasiou<sup>1</sup>,  
Wendy F. Liu<sup>1,2,3,4</sup>

<sup>1</sup> Department of Biomedical Engineering

<sup>2</sup> The Edwards Lifesciences Center for Advanced Cardiovascular Technology

<sup>3</sup> Department of Chemical and Biomolecular Engineering

<sup>4</sup> Department of Molecular Biology and Biochemistry

University of California Irvine

2412 Engineering Hall

Irvine, CA 92697

Tel: (949) 824-1682

Fax: (949) 824-9968

Email: [wendy.liu@uci.edu](mailto:wendy.liu@uci.edu)

\* To whom correspondence may be addressed.

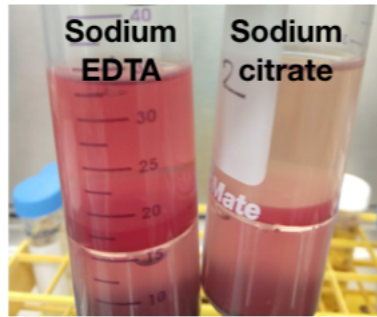

**Supplementary Figure 1: Comparison of anti-coagulants.** Isolation of peripheral blood-derived macrophages from blood stored in sodium EDTA and sodium citrate.

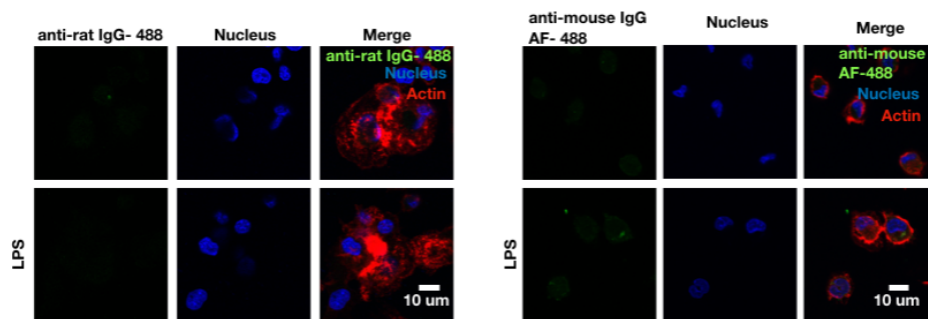

**Supplementary Figure 2:** Immunofluorescence confocal images of secondary antibodies stained for 1h in bone marrow-derived macrophages cultured on glass for 24 h and stimulated with LPS for 6 h.

**Supplementary Table 1:** List of primers used in this study for qRT-PCR analysis.

| Gene Name                      | Forward primer (5'-3') | Reverse primer (5'-3') |
|--------------------------------|------------------------|------------------------|
| <i>TNF-<math>\alpha</math></i> | TCCACCAACGTTTTCCTCAC   | ATCATCCTTCTCCAGCTGGAAG |
| <i>IL6</i>                     | TGGCAGAAAAAGACGGATGC   | TACTAATCTGCACAGCCTCGAC |
| <i>iNOS</i>                    | TGCCTTTGCTCATGACATCG   | AGAGCTTGGGGATCTGAATGTG |
| <i>ADGRE1</i>                  | ATGTGTCCGGCATATGCAAC   | TGGCAGGTTCTTGCAGATTG   |
| <i>GAPDH</i>                   | TGGCAAAGTGGACATTGTCG   | TCACCCCATTTGATGTTGTC   |
